# Supplementary material for: Nuclear myosin 1 activates p21 gene transcription in response to DNA damage through a chromatin-based mechanism
Source: PubMed Central journal article supplement (PMC7066169; doi:10.1038/s42003-020-0836-1), 2020-03-11
Supplement: 42003_2020_836_MOESM1_ESM.pdf [file 42003_2020_836_MOESM1_ESM.pdf]

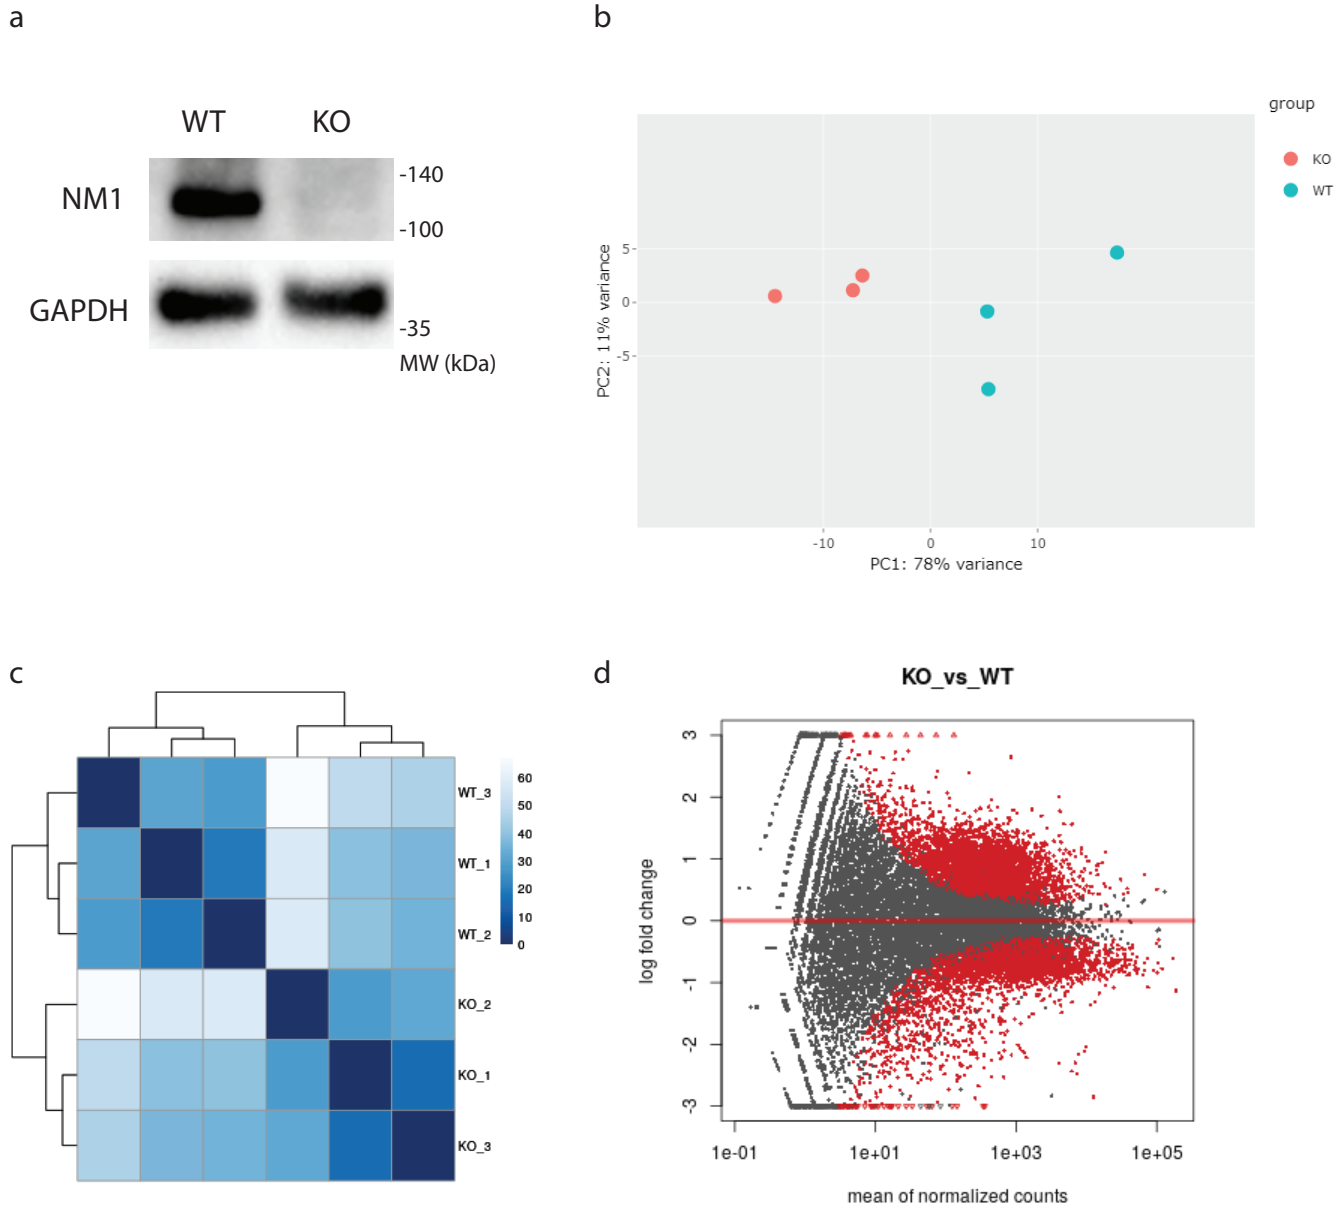

Supplementary Fig. 1. (a) Western blot analysis of primary mouse embryonic fibroblast derived from WT and NM1 KO embryos. (b) Principal component analysis (PCA) plots and distance heatmap (c) show that WT and KO samples cluster apart indicating higher variability between experimental groups than between samples within the same groups. (d) The differences in gene expression between WT and KO cells were visualized by MA plot by plotting the log<sub>2</sub> (fold change between KO and WT condition) versus the mean of normalized counts. Genes showed in grey do not show any significant change in their expression, while genes marked red are differentially expressed.

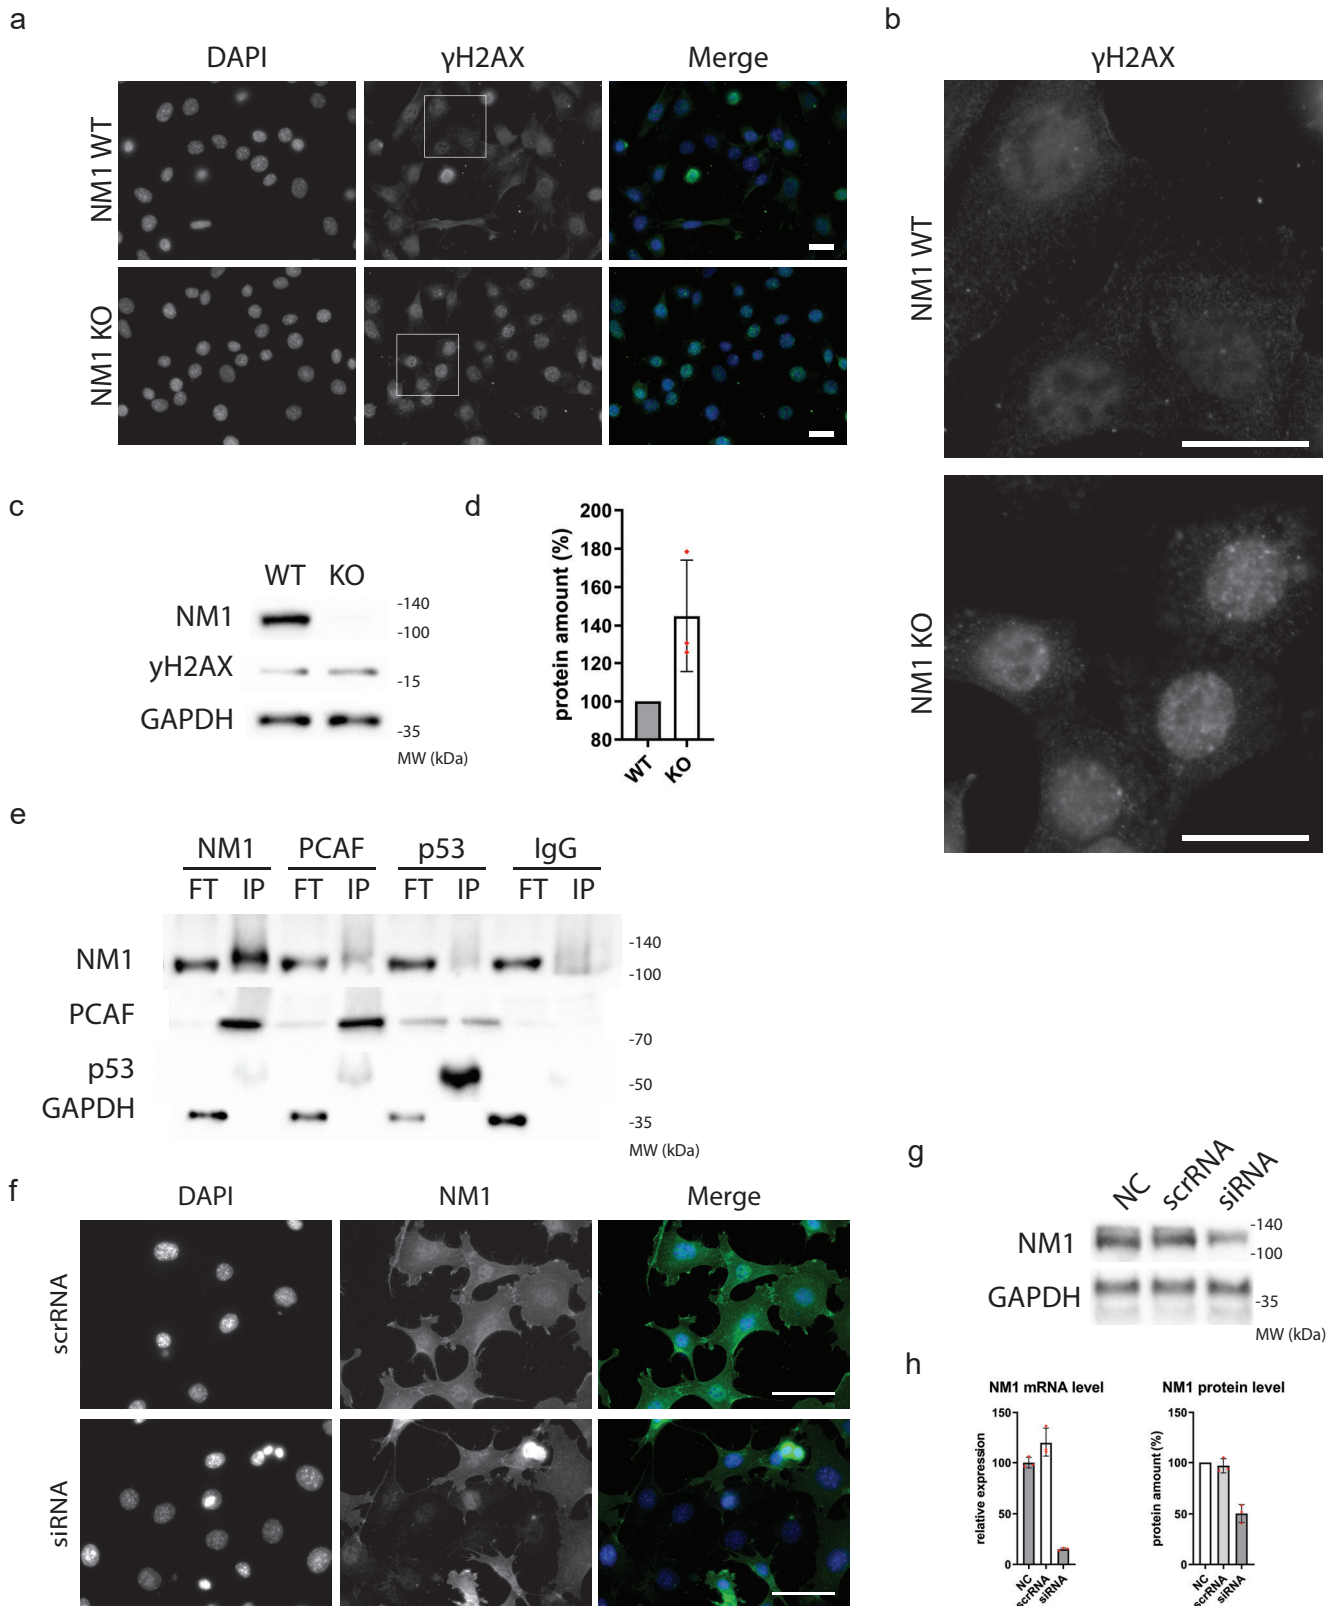

Supplementary Fig. 2. (a) Immunofluorescent staining of NM1 WT and KO cMEFs with an anti- $\gamma$ H2AX antibody. Nuclei are visualized by DAPI staining. Squares represents areas enlarged in (b). Scale bar is 5 $\mu$ m in both cases. (c) Western blot analysis of WT and KO cMEFs using anti-NM1, anti- $\gamma$ H2AX and anti-GAPDH antibodies. (d) Quantification of  $\gamma$ H2AX protein level in WT and KO cMEFs from western blots.  $n=3$  (e) Co-immunoprecipitation of proteins from untreated cells with antibodies against NM1, PCAF, p53 or control rabbit IgG and subsequent western blot analysis. (f) Immunofluorescent staining with DAPI and anti-NM1 antibodies of NM1 WT (scrRNA) and knockdown (KD) MEFs (siRNA). Scale bar is 10 $\mu$ m (g) Western blot analysis of WT and KD MEFs using anti-NM1 and anti-GAPDH antibodies. (h) Quantification of NM1 mRNA expression by qPCR relative to GAPDH expression and quantification of NM1 protein level by western blot.  $n=3$

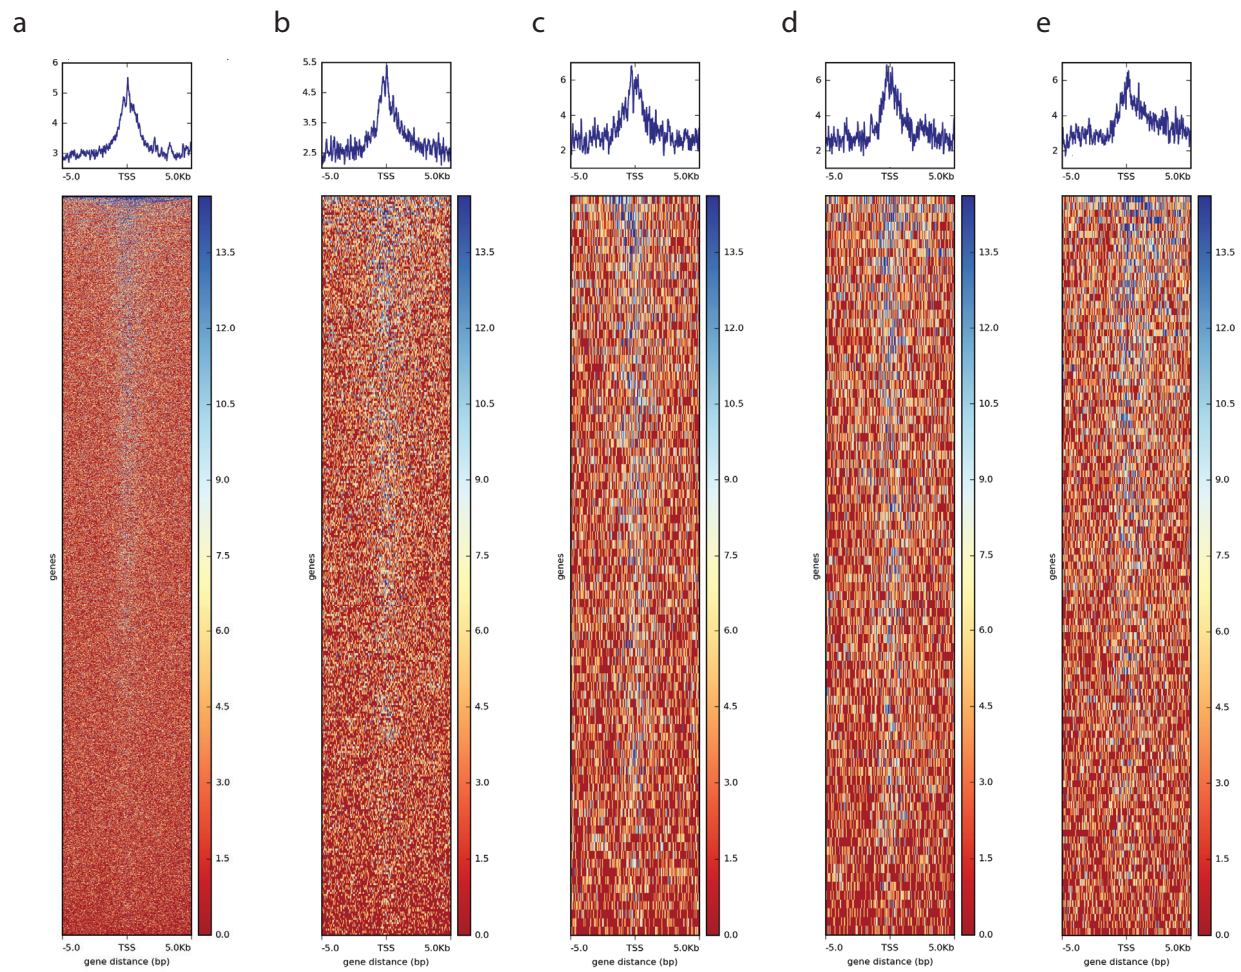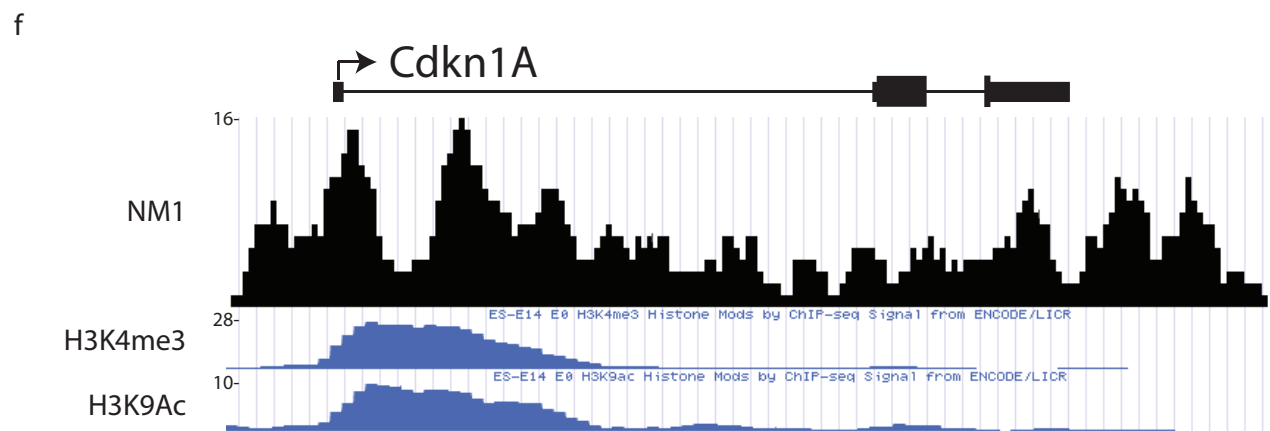

Supplementary Fig. 3. NM1 occupancy around transcription start sites (TSS) of selected gene groups analyzed by ChIP-Seq using an anti-NM1 antibody. (a) Density map of ChIP-seq reads for NM1  $\pm 5$  kb of the TSSs of all up- and down-regulated genes by at least 2-fold in KO cells. Scale bar, normalized RPKM. Top: shows the mean NM1 signal  $\pm 5$  kb around the TSSs. The same analysis was performed on differentially expressed genes by at least 2-fold in KO cells belonging to gene ontology groups "Regulation of transcription, DNA-templated" (b), "cell cycle" (c) and "DNA damage" (d) or on p53-regulated genes (e). (f) NM1 occupancy profile across the p21 gene as revealed by ChIP-Seq correlates with H3K4me3 and H3K9ac occupancies. The y-axis represents RPKM per bin. Gene position (exon: box, intron: line) are shown above the tracks.

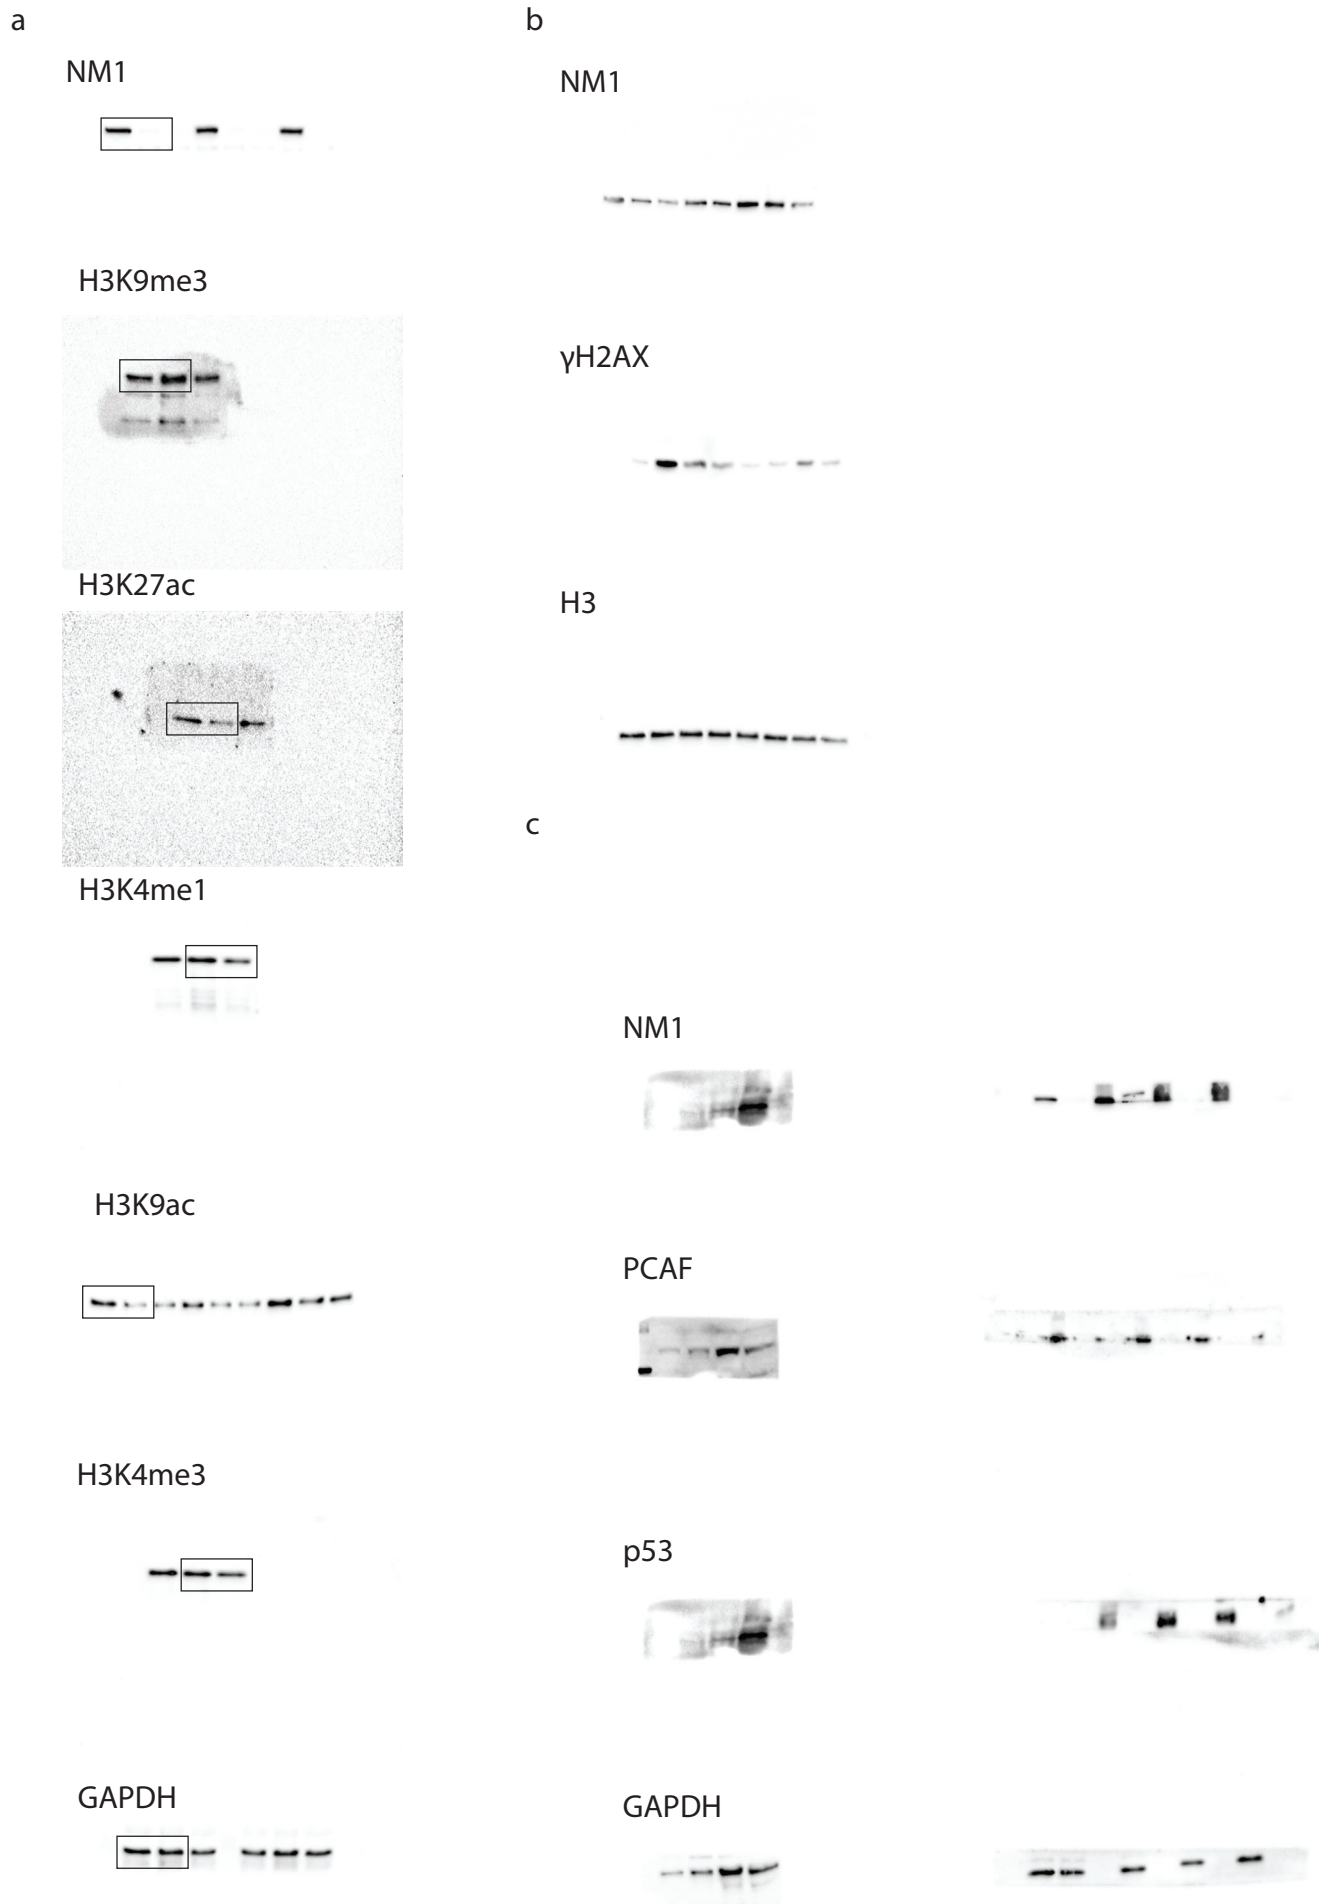

Supplementary Fig. 4. Full blots of raw data for Western analysis in Fig. 1c (a), Fig. 3e (b) and Fig. 5a (c)

**Supplementary Table 1.** Full list of gene ontology terms under “Biological process” group. All differentially expressed genes with at least 2-fold change in their expression were used for the gene ontology analysis.

| <b>Biology process Gene Ontology Term</b>                                                    | <b>Gene Count</b> | <b>Adj p-value</b> | <b>-LOG(p-value)</b> |
|----------------------------------------------------------------------------------------------|-------------------|--------------------|----------------------|
| GO:0006355~regulation of transcription, DNA-templated                                        | 342               | 7.25E-19           | 18.13942219          |
| GO:0003009~skeletal muscle contraction                                                       | 17                | 1.16E-07           | 6.935577828          |
| GO:0007049~cell cycle                                                                        | 105               | 6.24E-07           | 6.204759438          |
| GO:0006351~transcription, DNA-templated                                                      | 245               | 5.69E-06           | 5.244868655          |
| GO:0006281~DNA repair                                                                        | 63                | 7.22E-06           | 5.141478888          |
| GO:0006974~cellular response to DNA damage stimulus                                          | 76                | 9.35E-06           | 5.029038409          |
| GO:0051301~cell division                                                                     | 68                | 4.25E-05           | 4.371920053          |
| GO:0045893~positive regulation of transcription, DNA-templated                               | 90                | 3.27E-04           | 3.484850243          |
| GO:0045944~positive regulation of transcription from RNA polymerase II promoter              | 137               | 5.08E-04           | 3.294129448          |
| GO:0007067~mitotic nuclear division                                                          | 50                | 0.0024507          | 2.610709819          |
| GO:0043524~negative regulation of neuron apoptotic process                                   | 34                | 0.002952856        | 2.529757692          |
| GO:0007507~heart development                                                                 | 47                | 0.004329423        | 2.363569987          |
| GO:0008380~RNA splicing                                                                      | 43                | 0.012413529        | 1.906104741          |
| GO:0007519~skeletal muscle tissue development                                                | 17                | 0.014639587        | 1.83447119           |
| GO:0045214~sarcomere organization                                                            | 12                | 0.017161789        | 1.765437431          |
| GO:0060048~cardiac muscle contraction                                                        | 15                | 0.019484788        | 1.710304305          |
| GO:0051298~centrosome duplication                                                            | 10                | 0.020051923        | 1.697843982          |
| GO:0019886~antigen processing and presentation of exogenous peptide antigen via MHC class II | 8                 | 0.026571825        | 1.575578617          |
| GO:0006937~regulation of muscle contraction                                                  | 10                | 0.026995583        | 1.568707281          |

**Supplementary Table 2.** Distribution of genes with at least 2-fold change in their expression in NM1 KO cells within GO terms “Cell cycle”, “Cell division”, “DNA repair” and “Cell response to DNA damage stimulus”.

| GO term categories                       |
|------------------------------------------|
| (a) Cell cycle                           |
| (b) Cell division                        |
| (c) DNA repair                           |
| (d) Cell response to DNA damage stimulus |

| GO term | ENSEMBL Gene ID    | Gene symbol | Log2(FC)    | Adj p-value |
|---------|--------------------|-------------|-------------|-------------|
| (a)     | ENSMUSG00000022034 | Esco2       | 1.71125769  | 1.75E-07    |
| (a)     | ENSMUSG00000028282 | Casp8ap2    | 1.551348034 | 3.25E-11    |
| (a)     | ENSMUSG00000024235 | Map3k8      | 1.387446697 | 0.01929246  |
| (a)     | ENSMUSG00000027959 | Sass6       | 1.376733124 | 0.000280099 |
| (a)     | ENSMUSG00000037225 | Fgf2        | 1.367279237 | 0.039146925 |
| (a)     | ENSMUSG00000027641 | Rbl1        | 1.31450547  | 3.49E-08    |
| (a)     | ENSMUSG00000031314 | Taf1        | 1.248755035 | 2.18E-09    |
| (a)     | ENSMUSG00000040760 | Appl1       | 1.242777686 | 8.76E-08    |
| (a)     | ENSMUSG00000020516 | Rps6kb1     | 1.230871994 | 1.03E-07    |
| (a)     | ENSMUSG00000033054 | Npat        | 1.226229247 | 3.94E-08    |
| (a)     | ENSMUSG00000042508 | Dmtf1       | 1.202651622 | 1.98E-07    |
| (a)     | ENSMUSG00000021514 | Zfp369      | 1.198549742 | 0.000306578 |
| (a)     | ENSMUSG00000030498 | Gas2        | 1.193578183 | 6.68E-06    |
| (a)     | ENSMUSG00000029004 | Kmt2e       | 1.192193869 | 1.83E-07    |
| (a)     | ENSMUSG00000022422 | Dscc1       | 1.165604842 | 0.021949814 |
| (a)     | ENSMUSG00000027684 | Mecom       | 1.157018372 | 4.58E-08    |
| (a)     | ENSMUSG00000020074 | Ccar1       | 1.135993328 | 1.75E-07    |
| (a)     | ENSMUSG00000022369 | Mtbp        | 1.132494303 | 2.05E-06    |
| (a)     | ENSMUSG0000003031  | Cdkn1b      | 1.113385741 | 2.92E-07    |
| (a)     | ENSMUSG00000038344 | Txlng       | 1.10901253  | 0.000385779 |
| (a)     | ENSMUSG00000037725 | Ckap2       | 1.103049665 | 5.73E-12    |
| (a)     | ENSMUSG00000028693 | Nasp        | 1.100089109 | 8.71E-10    |
| (a)     | ENSMUSG00000021134 | Srsf5       | 1.064661573 | 1.01E-06    |
| (a)     | ENSMUSG00000031309 | Rps6ka3     | 1.060224915 | 2.38E-06    |
| (a)     | ENSMUSG00000035455 | Figl1       | 1.048817799 | 4.02E-05    |
| (a)     | ENSMUSG00000040943 | Tet2        | 1.041411013 | 0.008612205 |
| (a)     | ENSMUSG00000025907 | Rb1cc1      | 1.034686623 | 1.18E-06    |
| (a)     | ENSMUSG00000030061 | Uba3        | 1.032636754 | 1.02E-06    |
| (a)     | ENSMUSG0000002297  | Dbf4        | 1.027695204 | 1.13E-12    |
| (a)     | ENSMUSG00000037664 | Cdkn1c      | -1.09937341 | 0.000932629 |
| (a)     | ENSMUSG00000018217 | Pmp22       | -1.09944598 | 1.36E-15    |
| (a)     | ENSMUSG00000029161 | Cgref1      | -1.27336672 | 1.64E-05    |
| (a)     | ENSMUSG00000022510 | Trp63       | -1.32067766 | 0.000619776 |
| (a)     | ENSMUSG00000031906 | Smpd3       | -1.81346517 | 1.58E-06    |
| (a)     | ENSMUSG00000026459 | Myog        | -2.09776303 | 0.025198841 |
| (a)     | ENSMUSG00000032968 | Inha        | -2.17285767 | 1.11E-07    |

|         |                    |          |             |             |
|---------|--------------------|----------|-------------|-------------|
| (b)     | ENSMUSG00000041498 | Kif14    | 1.407968596 | 1.56E-10    |
| (b)     | ENSMUSG00000064128 | Cenpj    | 1.306488498 | 1.61E-05    |
| (b)     | ENSMUSG00000020687 | Cdc27    | 1.107296894 | 2.15E-09    |
| (b)     | ENSMUSG00000092074 | Dynlt1a  | -1.03671742 | 0.005114056 |
| (c)     | ENSMUSG00000029191 | Rfc1     | 1.083442265 | 1.88E-08    |
| (c)     | ENSMUSG00000057113 | Npm1     | 1.032903963 | 3.79E-12    |
| (c)     | ENSMUSG00000040455 | Usp45    | 1.032024083 | 2.82E-06    |
| (c)     | ENSMUSG00000025612 | Bach1    | 1.021893011 | 1.48E-05    |
| (c)     | ENSMUSG00000036611 | Eepd1    | -1.00505915 | 0.025738484 |
| (d)     | ENSMUSG00000017550 | Atad5    | 1.479674207 | 1.50E-08    |
| (d)     | ENSMUSG00000037474 | Dtl      | 1.402979577 | 4.09E-09    |
| (d)     | ENSMUSG00000020914 | Top2a    | 1.399778224 | 3.49E-26    |
| (d)     | ENSMUSG00000000838 | Fmr1     | 1.203460151 | 6.48E-09    |
| (d)     | ENSMUSG00000078671 | Chd2     | 1.204433661 | 4.59E-06    |
| (d)     | ENSMUSG00000078773 | Rad54b   | 1.122985626 | 0.014339615 |
| (d)     | ENSMUSG00000025899 | Alkbh8   | 1.103785558 | 0.000331767 |
| (d)     | ENSMUSG00000061175 | Fnip2    | 1.076536669 | 4.43E-08    |
| (d)     | ENSMUSG00000029238 | Clock    | 1.07711291  | 5.78E-06    |
| (d)     | ENSMUSG00000005871 | Apc      | 1.066374352 | 1.36E-06    |
| (d)     | ENSMUSG00000031628 | Casp3    | 1.00619731  | 3.55E-09    |
| (d)     | ENSMUSG00000036278 | Macrod1  | -1.02872404 | 0.002191828 |
| (d)     | ENSMUSG00000035105 | Egln3    | -1.0928509  | 0.000210195 |
| (d)     | ENSMUSG00000034266 | Batf     | -1.20463002 | 0.031876678 |
| (a) (b) | ENSMUSG00000026039 | Sgo2a    | 1.909563191 | 6.48E-07    |
| (a) (b) | ENSMUSG00000033952 | Aspm     | 1.775575754 | 4.25E-12    |
| (a) (b) | ENSMUSG00000024795 | Kif20b   | 1.634977084 | 3.91E-14    |
| (a) (b) | ENSMUSG00000012443 | Kif11    | 1.603421777 | 3.41E-17    |
| (a) (b) | ENSMUSG00000028312 | Smc2     | 1.573512833 | 2.45E-12    |
| (a) (b) | ENSMUSG00000045328 | Cenpe    | 1.572827733 | 8.49E-17    |
| (a) (b) | ENSMUSG00000027326 | Kn1      | 1.563390397 | 1.00E-07    |
| (a) (b) | ENSMUSG00000047534 | Mis18bp1 | 1.517024431 | 1.49E-08    |
| (a) (b) | ENSMUSG00000042029 | Ncapg2   | 1.509516693 | 7.57E-13    |
| (a) (b) | ENSMUSG00000028212 | Ccne2    | 1.507953072 | 6.79E-07    |
| (a) (b) | ENSMUSG00000028549 | Itgb3bp  | 1.48940185  | 0.031365882 |
| (a) (b) | ENSMUSG00000079555 | Haus3    | 1.480637897 | 5.00E-08    |
| (a) (b) | ENSMUSG00000057110 | Cntrl    | 1.468431833 | 3.10E-08    |
| (a) (b) | ENSMUSG00000034349 | Smc4     | 1.45192783  | 1.61E-16    |
| (a) (b) | ENSMUSG00000025001 | Hells    | 1.419697178 | 3.03E-10    |
| (a) (b) | ENSMUSG00000027550 | Lrrcc1   | 1.390931974 | 1.26E-08    |
| (a) (b) | ENSMUSG00000027379 | Bub1     | 1.384823294 | 3.65E-13    |
| (a) (b) | ENSMUSG00000024989 | Cep55    | 1.340374265 | 1.44E-09    |
| (a) (b) | ENSMUSG00000029283 | Cdc7     | 1.334398549 | 1.60E-06    |
| (a) (b) | ENSMUSG00000069910 | Spdl1    | 1.311022532 | 6.51E-09    |
| (a) (b) | ENSMUSG00000066842 | Hmcn1    | 1.272988648 | 6.95E-09    |
| (a) (b) | ENSMUSG00000020492 | Ska2     | 1.267818894 | 2.12E-08    |
| (a) (b) | ENSMUSG00000026088 | Mitd1    | 1.265919516 | 1.59E-05    |
| (a) (b) | ENSMUSG00000026349 | Ccnt2    | 1.265146821 | 1.58E-07    |
| (a) (b) | ENSMUSG00000025925 | Terf1    | 1.256138736 | 7.08E-05    |
| (a) (b) | ENSMUSG00000026683 | Nuf2     | 1.255075727 | 1.48E-10    |

|         |                    |          |             |             |
|---------|--------------------|----------|-------------|-------------|
| (a) (b) | ENSMUSG00000019773 | Fbxo5    | 1.253415838 | 3.40E-09    |
| (a) (b) | ENSMUSG00000024056 | Ndc80    | 1.232028251 | 1.64E-07    |
| (a) (b) | ENSMUSG00000027306 | Nusap1   | 1.2301627   | 3.44E-07    |
| (a) (b) | ENSMUSG00000006005 | Tpr      | 1.214905394 | 2.19E-08    |
| (a) (b) | ENSMUSG00000021537 | Cetn3    | 1.207782895 | 4.45E-07    |
| (a) (b) | ENSMUSG00000031010 | Usp9x    | 1.196779331 | 9.50E-08    |
| (a) (b) | ENSMUSG00000027699 | Ect2     | 1.19635231  | 1.25E-12    |
| (a) (b) | ENSMUSG00000023940 | Sgo1     | 1.193653756 | 6.44E-08    |
| (a) (b) | ENSMUSG00000029253 | Cenpc1   | 1.186376171 | 5.65E-09    |
| (a) (b) | ENSMUSG00000040549 | Ckap5    | 1.179993853 | 1.50E-11    |
| (a) (b) | ENSMUSG00000011831 | Evi5     | 1.143930743 | 6.97E-07    |
| (a) (b) | ENSMUSG00000041408 | Wapl     | 1.124679756 | 3.45E-08    |
| (a) (b) | ENSMUSG00000071350 | Setdb2   | 1.119074357 | 0.000879931 |
| (a) (b) | ENSMUSG00000024073 | Birc6    | 1.114930938 | 3.03E-08    |
| (a) (b) | ENSMUSG00000022978 | Mis18a   | 1.112562071 | 4.61E-05    |
| (a) (b) | ENSMUSG00000026276 | Sept2    | 1.099680125 | 1.88E-08    |
| (a) (b) | ENSMUSG00000033392 | Clasp2   | 1.089021917 | 1.53E-06    |
| (a) (b) | ENSMUSG00000032254 | Kif23    | 1.080402023 | 1.31E-13    |
| (a) (b) | ENSMUSG00000033502 | Cdc14a   | 1.061962646 | 0.004605975 |
| (a) (b) | ENSMUSG00000036777 | Anln     | 1.055690048 | 1.11E-17    |
| (a) (b) | ENSMUSG00000022070 | Bora     | 1.050087626 | 2.43E-05    |
| (a) (b) | ENSMUSG00000061665 | Cd2ap    | 1.040444725 | 1.24E-05    |
| (a) (b) | ENSMUSG00000045038 | Prkce    | 1.028061461 | 0.000470685 |
| (a) (b) | ENSMUSG00000032400 | Zwilch   | 1.026745785 | 2.71E-06    |
| (a) (b) | ENSMUSG00000001833 | Sept7    | 1.023457115 | 9.09E-12    |
| (a) (b) | ENSMUSG00000034165 | Ccnd3    | -1.00945581 | 0.000118684 |
| (a) (b) | ENSMUSG00000020486 | Sept4    | -1.02226256 | 0.002360257 |
| (a) (b) | ENSMUSG00000020782 | Llgl2    | -1.44386307 | 2.38E-11    |
| (b) (c) | ENSMUSG00000029202 | Pds5a*   | 1.201910032 | 1.39E-09    |
| (c) (d) | ENSMUSG00000044702 | Palb2    | 1.863631886 | 1.57E-05    |
| (c) (d) | ENSMUSG00000034206 | Polq     | 1.445801595 | 3.40E-07    |
| (c) (d) | ENSMUSG00000031004 | Mki67    | 1.79933243  | 2.33E-17    |
| (c) (d) | ENSMUSG00000051235 | Gen1     | 1.519385037 | 6.16E-06    |
| (c) (d) | ENSMUSG00000019841 | Rev3l    | 1.426095931 | 9.92E-08    |
| (c) (d) | ENSMUSG00000022672 | Prkdc    | 1.22003098  | 0.000133917 |
| (c) (d) | ENSMUSG00000035365 | Parpbp   | 1.39941138  | 3.46E-06    |
| (c) (d) | ENSMUSG00000090112 | Shprh    | 1.353053025 | 2.20E-09    |
| (c) (d) | ENSMUSG00000032409 | Atr      | 1.291894951 | 3.45E-07    |
| (c) (d) | ENSMUSG00000043535 | Setx     | 1.373700818 | 4.14E-10    |
| (c) (d) | ENSMUSG00000047757 | Fancb    | 1.315244506 | 0.000211638 |
| (c) (d) | ENSMUSG00000039396 | Neil3    | 1.633939602 | 0.000703607 |
| (c) (d) | ENSMUSG00000030346 | Rad51ap1 | 1.290324138 | 9.33E-06    |
| (c) (d) | ENSMUSG00000031229 | Atrx     | 1.41187585  | 5.51E-07    |
| (c) (d) | ENSMUSG00000030655 | Smg1     | 1.242009981 | 4.22E-10    |
| (c) (d) | ENSMUSG00000030528 | Blm      | 1.273197151 | 3.56E-07    |
| (c) (d) | ENSMUSG00000040865 | Ino80d   | 1.347529884 | 7.56E-09    |
| (c) (d) | ENSMUSG00000020608 | Smc6     | 1.247215661 | 1.78E-09    |
| (c) (d) | ENSMUSG00000035726 | Supt16   | 1.306438017 | 1.31E-10    |
| (c) (d) | ENSMUSG00000028560 | Usp1     | 1.183301369 | 1.30E-14    |



|                 |                    |          |             |             |
|-----------------|--------------------|----------|-------------|-------------|
| (c) (d)         | ENSMUSG00000061755 | Bod1l    | 1.172778402 | 1.95E-08    |
| (c) (d)         | ENSMUSG00000055884 | Fancm    | 1.186915058 | 3.31E-07    |
| (c) (d)         | ENSMUSG00000017291 | Taok1    | 1.130463947 | 6.54E-07    |
| (c) (d)         | ENSMUSG00000069495 | Epc2     | 1.19314929  | 2.27E-07    |
| (c) (d)         | ENSMUSG00000026196 | Bard1    | 1.092585576 | 0.001476677 |
| (c) (d)         | ENSMUSG00000040204 | Pclaf    | 1.125698623 | 9.31E-15    |
| (c) (d)         | ENSMUSG00000054051 | Ercc6    | 1.152473285 | 1.23E-05    |
| (c) (d)         | ENSMUSG00000039748 | Exo1     | 1.142964897 | 1.97E-07    |
| (c) (d)         | ENSMUSG00000037355 | Uvssa    | 1.133401711 | 1.34E-05    |
| (c) (d)         | ENSMUSG00000032555 | Topbp1   | 1.092956409 | 4.32E-12    |
| (c) (d)         | ENSMUSG00000038774 | Ascc3    | 1.096053881 | 8.51E-06    |
| (c) (d)         | ENSMUSG00000012483 | Rpa3     | 1.091175918 | 5.60E-05    |
| (c) (d)         | ENSMUSG00000026082 | Rev1     | 1.090772336 | 4.55E-08    |
| (c) (d)         | ENSMUSG00000030254 | Rad18    | 1.078147681 | 2.37E-08    |
| (c) (d)         | ENSMUSG00000035401 | Emsy     | 1.07744376  | 7.91E-08    |
| (c) (d)         | ENSMUSG00000026648 | Dclre1c  | 1.072730394 | 0.001601497 |
| (c) (d)         | ENSMUSG00000021597 | Ankrd32  | 1.059630232 | 0.002238719 |
| (c) (d)         | ENSMUSG00000030322 | Mbd4     | 1.035245167 | 0.004381754 |
| (c) (d)         | ENSMUSG00000034329 | Brip1    | 1.039915227 | 0.001129563 |
| (c) (d)         | ENSMUSG00000025878 | Uimc1    | 1.028796906 | 5.56E-05    |
| (c) (d)         | ENSMUSG00000035234 | Abraxas1 | 1.022349089 | 0.008214339 |
| (c) (d)         | ENSMUSG00000021470 | Ercc6l2  | 1.018837521 | 8.05E-06    |
| (c) (d)         | ENSMUSG00000017897 | Eya2     | -1.0658211  | 0.014777507 |
| (c) (d)         | ENSMUSG00000054612 | Mgmt     | -1.07027509 | 0.003450678 |
| (a) (b) (c)     | ENSMUSG00000034021 | Pds5b*   | 1.298188038 | 2.46E-12    |
| (a) (b) (d)     | ENSMUSG00000031644 | Nek1*    | 1.366192385 | 7.81E-05    |
| (a) (b) (d)     | ENSMUSG00000026779 | Mastl*   | 1.220412317 | 1.91E-08    |
| (a) (c) (d)     | ENSMUSG00000032113 | Chek1*   | 1.566094962 | 4.19E-07    |
| (a) (c) (d)     | ENSMUSG00000017146 | Brca1*   | 1.472344273 | 1.31E-08    |
| (a) (c) (d)     | ENSMUSG00000034218 | Atm*     | 1.357826304 | 9.45E-10    |
| (a) (c) (d)     | ENSMUSG00000028224 | Nbn*     | 1.108696916 | 1.36E-07    |
| (a) (c) (d)     | ENSMUSG00000020380 | Rad50*   | 1.061644738 | 6.87E-07    |
| (a) (c) (d)     | ENSMUSG00000042489 | Clspn*   | 1.281453016 | 6.20E-09    |
| (a) (c) (d)     | ENSMUSG00000041147 | Brca2*   | 1.290020428 | 0.000105344 |
| (a) (b) (c) (d) | ENSMUSG00000024943 | Smc5*    | 1.435523352 | 5.32E-07    |
| (a) (b) (c) (d) | ENSMUSG00000024974 | Smc3*    | 1.37505807  | 2.74E-11    |
| (a) (b) (c) (d) | ENSMUSG00000041133 | Smc1a*   | 1.282471991 | 2.76E-13    |
| (a) (b) (c) (d) | ENSMUSG00000049717 | Lig4*    | 1.117129153 | 8.05E-06    |
| (a) (b) (c) (d) | ENSMUSG00000034154 | Ino80*   | 1.098229249 | 1.76E-06    |
| (a) (b) (c) (d) | ENSMUSG00000041238 | Rbbp8*   | 1.082292963 | 6.77E-06    |

Supplementary Table 3. Differentially expressed genes in NM1 KO cells related to "Cell cycle", "DNA repair" and "Cell response to DNA damage stimulus" GO terms which are

| GO term categories                       |  |
|------------------------------------------|--|
| (a) Cell cycle                           |  |
| (b) DNA repair                           |  |
| (c) Cell response to DNA damage stimulus |  |

| GO term | ENSEMBL Gene ID     | Gene symbol   | Log2(FC)    | Adj p-value |
|---------|---------------------|---------------|-------------|-------------|
| (a)     | ENSMUSG00000000001  | Gnai3         | 0.996941229 | 7.62E-08    |
| (a)     | ENSMUSG00000040021  | Lats1         | 0.992505061 | 3.00E-06    |
| (a)     | ENSMUSG00000025862  | Stag2         | 0.985716597 | 2.49E-07    |
| (a)     | ENSMUSG00000031878  | Nae1          | 0.983639482 | 1.47E-08    |
| (a)     | ENSMUSG00000004591  | Pkn2          | 0.979980767 | 1.48E-07    |
| (a)     | ENSMUSG00000014956  | Ppp1cb        | 0.977841841 | 1.46E-10    |
| (a)     | ENSMUSG00000033364  | Usp37         | 0.968367638 | 0.000151952 |
| (a)     | ENSMUSG00000021693  | Kif2a         | 0.963140158 | 5.15E-10    |
| (a)     | ENSMUSG00000019256  | Ahr           | 0.960854025 | 2.62E-05    |
| (a)     | ENSMUSG00000062510  | Nsl1          | 0.941932089 | 0.000970428 |
| (a)     | ENSMUSG00000038943  | Prc1          | 0.939045578 | 1.58E-12    |
| (a)     | ENSMUSG00000035310  | Lin54         | 0.937098729 | 7.02E-06    |
| (a)     | ENSMUSG00000037286  | Stag1         | 0.915517364 | 8.62E-06    |
| (a)     | ENSMUSG00000036779  | Papd5         | 0.913333319 | 3.29E-05    |
| (a)     | ENSMUSG00000033900  | Map9          | 0.906400923 | 0.000279853 |
| (a)     | ENSMUSG00000033713  | Foxn3         | 0.902517222 | 0.001579369 |
| (a)     | ENSMUSG00000040599  | Mis12         | 0.900196162 | 4.19E-07    |
| (a)     | ENSMUSG00000058729  | Lin9          | 0.899715432 | 0.000215755 |
| (a)     | ENSMUSG00000026491  | Ahctf1        | 0.896519017 | 8.07E-08    |
| (a)     | ENSMUSG00000031529  | Tnks          | 0.891638119 | 3.78E-06    |
| (a)     | ENSMUSG00000029414  | Kntc1         | 0.890939054 | 8.19E-07    |
| (a)     | ENSMUSG00000021965  | Ska3          | 0.889671928 | 7.08E-05    |
| (a)     | ENSMUSG00000040860  | Croc          | 0.883959086 | 0.00010777  |
| (a)     | ENSMUSG00000042688  | Mapk6         | 0.883064928 | 3.18E-05    |
| (a)     | ENSMUSG00000035024  | Ncapd3        | 0.875202282 | 2.66E-06    |
| (a)     | ENSMUSG00000070923  | Klh19         | 0.874370162 | 5.18E-08    |
| (a)     | ENSMUSG00000026361  | Cdc73         | 0.868872448 | 6.53E-05    |
| (a)     | ENSMUSG00000049327  | Kmt5a         | 0.864936958 | 4.69E-07    |
| (a)     | ENSMUSG0000000708   | Kat2b         | 0.863171531 | 0.001315128 |
| (a)     | ENSMUSG00000011960  | Ccnt1         | 0.862489127 | 1.78E-06    |
| (a)     | ENSMUSG00000019988  | Nedd1         | 0.861030494 | 1.50E-05    |
| (a)     | ENSMUSG00000032064  | Dixdc1        | 0.8601254   | 0.000527328 |
| (a)     | ENSMUSG00000037544  | Dlgap5        | 0.859497645 | 3.59E-06    |
| (a)     | ENSMUSG00000024817  | Uhrf2         | 0.857840052 | 2.92E-07    |
| (a)     | ENSMUSG00000019917  | Sept10        | 0.855627366 | 1.48E-05    |
| (a)     | ENSMUSG00000055024  | Ep300         | 0.853455036 | 1.71E-07    |
| (a)     | ENSMUSG00000031242  | Z610002M06Rik | 0.851318227 | 0.000422968 |
| (a)     | ENSMUSG0000004085   | Map3k20       | 0.847026077 | 1.34E-06    |
| (a)     | ENSMUSG00000009907  | Vps4b         | 0.843221519 | 1.43E-05    |
| (a)     | ENSMUSG00000022961  | Son           | 0.840871546 | 5.18E-05    |
| (a)     | ENSMUSG00000028926  | Cdk14         | 0.840015602 | 1.82E-07    |
| (a)     | ENSMUSG00000027339  | Rassf2        | 0.837636714 | 0.026772284 |
| (a)     | ENSMUSG00000029516  | Cit           | 0.835951871 | 4.06E-05    |
| (a)     | ENSMUSG00000031176  | Dynlt3        | 0.825721071 | 0.000513279 |
| (a)     | ENSMUSG00000071533  | Pcnp          | 0.825357383 | 8.63E-08    |
| (a)     | ENSMUSG00000045636  | Mtus1         | 0.796443192 | 0.012430708 |
| (a)     | ENSMUSG00000029176  | Anapc4        | 0.794112061 | 7.47E-08    |
| (a)     | ENSMUSG00000035437  | Rabgap1       | 0.792940738 | 2.16E-06    |
| (a)     | ENSMUSG00000048922  | Cdca2         | 0.787828557 | 1.68E-05    |
| (a)     | ENSMUSG00000027363  | Usp8          | 0.770905267 | 2.18E-05    |
| (a)     | ENSMUSG00000052957  | Gas1          | 0.765206306 | 1.00E-05    |
| (a)     | ENSMUSG00000022673  | Mcm4          | 0.760939171 | 1.48E-08    |
| (a)     | ENSMUSG00000029684  | Wasl          | 0.760114142 | 1.69E-05    |
| (a)     | ENSMUSG00000038822  | Hace1         | 0.759679543 | 0.008202905 |
| (a)     | ENSMUSG00000024293  | Esco1         | 0.755967885 | 0.020529321 |
| (a)     | ENSMUSG00000035351  | Nup37         | 0.752526128 | 0.003004564 |
| (a)     | ENSMUSG00000026646  | Suv39h2       | 0.749463316 | 0.031519836 |
| (a)     | ENSMUSG00000006715  | Gmnn          | 0.746635058 | 0.001096575 |
| (a)     | ENSMUSG00000029910  | Mad21         | 0.740339309 | 1.20E-05    |
| (a)     | ENSMUSG00000031666  | Rbl2          | 0.731722344 | 0.001831831 |
| (a)     | ENSMUSG00000024576  | Csnk1a1       | 0.730034039 | 1.81E-06    |
| (a)     | ENSMUSG00000046179  | F2f8          | 0.729451798 | 0.002016351 |
| (a)     | ENSMUSG00000005233  | Spc25         | 0.724869324 | 0.000343321 |
| (a)     | ENSMUSG00000005102  | Eif2ak4       | 0.722856555 | 0.000318886 |
| (a)     | ENSMUSG00000040084  | Bub1b         | 0.718403847 | 1.28E-06    |
| (a)     | ENSMUSG00000035469  | Rcbtb1        | 0.717254493 | 9.31E-06    |
| (a)     | ENSMUSG00000075266  | Cenpf         | 0.707203591 | 0.023192542 |
| (a)     | ENSMUSG00000028551  | Cdkn2c        | 0.70193457  | 0.034982674 |
| (a)     | ENSMUSG00000031971  | Ccsap         | 0.697707905 | 0.016869769 |
| (a)     | ENSMUSG00000040274  | Cdk6          | 0.693307708 | 0.000128983 |
| (a)     | ENSMUSG00000021548  | Ccnh          | 0.689344512 | 0.000370144 |
| (a)     | ENSMUSG000000051220 | Erc6          | 0.685503352 | 0.000456719 |
| (a)     | ENSMUSG00000036977  | Anapc10       | 0.682643055 | 0.021021237 |
| (a)     | ENSMUSG00000052062  | Pard3b        | 0.677195833 | 0.0406557   |
| (a)     | ENSMUSG00000027285  | Haus2         | 0.676432114 | 0.001545984 |

| GO term | ENSEMBL Gene ID     | Gene symbol | Log2(FC)     | Adj p-value |
|---------|---------------------|-------------|--------------|-------------|
| (b)     | ENSMUSG00000046295  | Ankle1      | 0.982403767  | 0.016079119 |
| (b)     | ENSMUSG00000036023  | Parp2       | 0.916404529  | 6.83E-05    |
| (b)     | ENSMUSG00000019857  | Asf1a       | 0.886025085  | 8.46E-05    |
| (b)     | ENSMUSG00000030243  | Recql       | 0.804753272  | 0.000161298 |
| (b)     | ENSMUSG00000027433  | Xrn2        | 0.637377634  | 7.45E-06    |
| (b)     | ENSMUSG00000045482  | Trrap       | 0.528301905  | 0.000191994 |
| (b)     | ENSMUSG00000058301  | Upf1        | 0.518112542  | 0.000377879 |
| (b)     | ENSMUSG00000005566  | Trim28      | -0.508336707 | 0.010747865 |
| (b)     | ENSMUSG00000030689  | Ino80e      | -0.580955068 | 0.017484288 |
| (b)     | ENSMUSG00000018449  | Rpain       | -0.694953338 | 0.009733652 |
| (b)     | ENSMUSG00000010362  | Rdm1        | -0.916100844 | 0.009474129 |
| (c)     | ENSMUSG00000038069  | Cdkn2aip    | 0.998821056  | 0.000331767 |
| (c)     | ENSMUSG00000033721  | Vav3        | 0.997508095  | 0.002156107 |
| (c)     | ENSMUSG00000030779  | Rbbp6       | 0.991554753  | 2.25E-06    |
| (c)     | ENSMUSG00000020063  | Sirt1       | 0.972675002  | 6.50E-05    |
| (c)     | ENSMUSG00000021911  | Parg        | 0.953491882  | 1.40E-06    |
| (c)     | ENSMUSG00000036822  | Topors      | 0.943265508  | 1.59E-06    |
| (c)     | ENSMUSG00000027104  | Atf2        | 0.941980341  | 6.46E-06    |
| (c)     | ENSMUSG00000002748  | Baz1b       | 0.920770824  | 1.77E-09    |
| (c)     | ENSMUSG00000035764  | Fbxo45      | 0.916170515  | 0.000123152 |
| (c)     | ENSMUSG00000027242  | Wdr76       | 0.900502455  | 0.007716902 |
| (c)     | ENSMUSG00000020228  | Helb        | 0.911363024  | 0.001421294 |
| (c)     | ENSMUSG00000024283  | Wac         | 0.867344505  | 8.32E-07    |
| (c)     | ENSMUSG00000021245  | Mlh3        | 0.859572462  | 0.017304516 |
| (c)     | ENSMUSG00000038369  | Ncoa6       | 0.749981745  | 1.16E-05    |
| (c)     | ENSMUSG00000034342  | Cbl         | 0.738525482  | 0.002549156 |
| (c)     | ENSMUSG00000061759  | Armt1       | 0.713850153  | 0.000239336 |
| (c)     | ENSMUSG000000058761 | Rnf169      | 0.711363024  | 0.000175541 |
| (c)     | ENSMUSG00000064289  | Tank        | 0.702470812  | 0.000190801 |
| (c)     | ENSMUSG00000024521  | Pmaip1      | 0.661633472  | 0.002714083 |
| (c)     | ENSMUSG00000040433  | Zbtb38      | 0.628726542  | 0.01180967  |
| (c)     | ENSMUSG00000037111  | Setd7       | 0.626799643  | 0.000218393 |
| (c)     | ENSMUSG00000038005  | Hpf1        | 0.62658934   | 0.000813037 |
| (c)     | ENSMUSG00000020546  | Stxbp4      | 0.622447458  | 0.006129364 |
| (c)     | ENSMUSG00000028086  | Fbxw7       | 0.590674969  | 0.017887136 |
| (c)     | ENSMUSG00000027164  | Traf6       | 0.51391341   | 0.013985779 |
| (c)     | ENSMUSG00000020898  | Ctcf        | -0.535910722 | 0.002275919 |
| (c)     | ENSMUSG00000001924  | Uba1        | -0.607278596 | 3.78E-05    |
| (c)     | ENSMUSG00000019969  | Psen1       | -0.645143162 | 4.81E-05    |
| (c)     | ENSMUSG00000024429  | Gnl1        | -0.702426178 | 0.000147022 |
| (c)     | ENSMUSG00000001729  | Akt1        | -0.729399647 | 3.43E-05    |
| (c)     | ENSMUSG00000002661  | Alkbh7      | -0.770051252 | 0.005064014 |
| (c)     | ENSMUSG00000037032  | Appb1       | -0.770884308 | 0.002365413 |
| (c)     | ENSMUSG00000016528  | Mapkapk2    | -0.787622821 | 4.5E-06     |
| (c)     | ENSMUSG00000030086  | Chchd6      | -0.801534948 | 0.009583763 |
| (c)     | ENSMUSG00000003873  | Bax         | -0.841153491 | 0.002046812 |
| (a) (b) | ENSMUSG00000000902  | Smarcb1     | -0.544164895 | 0.017342225 |
| (a) (c) | ENSMUSG00000021918  | Nek4        | 0.887565334  | 0.006131325 |
| (a) (c) | ENSMUSG000000041997 | Ttk1        | 0.869382937  | 8.72E-06    |
| (a) (c) | ENSMUSG000000003355 | Mcts1       | 0.853928055  | 0.000317955 |
| (a) (c) | ENSMUSG00000032397  | Tipin       | 0.849583359  | 1.25E-05    |
| (a) (c) | ENSMUSG00000025616  | Usp16       | 0.830152386  | 0.000240882 |
| (a) (c) | ENSMUSG00000020694  | Tlk2        | 0.801024671  | 1.59E-05    |
| (a) (c) | ENSMUSG00000036390  | Gadd45a     | 0.732346094  | 0.022450659 |
| (a) (c) | ENSMUSG00000028680  | Plk3        | -0.617954601 | 0.001241811 |
| (a) (c) | ENSMUSG00000029003  | Mad2l2      | -0.645537059 | 0.010826731 |
| (a) (c) | ENSMUSG00000000552  | Zfp385a     | -0.672828603 | 0.007085932 |
| (a) (c) | ENSMUSG00000010067  | Rassf1      | -0.755849728 | 0.000821134 |
| (a) (c) | ENSMUSG00000063065  | Mapk3       | -0.819778973 | 0.000125395 |
| (a) (c) | ENSMUSG00000030538  | Cib1        | -0.920205672 | 0.000105398 |
| (a) (c) | ENSMUSG00000035390  | Brsk1       | -0.910318547 | 1.49E-05    |
| (b) (c) | ENSMUSG00000022906  | Parp9       | 0.951176633  | 0.018655675 |
| (b) (c) | ENSMUSG00000040850  | Psmc4       | 0.950909964  | 1.95E-08    |
| (b) (c) | ENSMUSG00000014850  | Msh3        | 0.944249559  | 0.000120674 |
| (b) (c) | ENSMUSG00000059263  | Usp47       | 0.939980339  | 8.49E-08    |
| (b) (c) | ENSMUSG00000036097  | Sif2        | 0.935528498  | 4.09E-07    |
| (b) (c) | ENSMUSG00000035958  | Tdp2        | 0.894656511  | 0.000143195 |
| (b) (c) | ENSMUSG00000025932  | Eya1        | 0.894648821  | 0.000126869 |
| (b) (c) | ENSMUSG00000029920  | Smarcad1    | 0.894380464  | 4.06E-06    |
| (b) (c) | ENSMUSG00000033454  | Zbtb1       | 0.883326664  | 0.000222751 |
| (b) (c) | ENSMUSG00000037487  | Ubr5        | 0.874756558  | 3.48E-06    |
| (b) (c) | ENSMUSG00000031583  | Wrn         | 0.861205217  | 0.000999281 |
| (b) (c) | ENSMUSG00000021668  | Polk        | 0.856226135  | 1.13E-07    |
| (b) (c) | ENSMUSG00000033458  | Fan1        | 0.854315599  | 0.005452383 |
| (b) (c) | ENSMUSG00000028329  | Xpa         | 0.853171558  | 0.009768513 |

|     |                    |                 |              |             |
|-----|--------------------|-----------------|--------------|-------------|
| (a) | ENSMUSG00000030965 | Abraxas2        | 0.674096459  | 0.000926759 |
| (a) | ENSMUSG00000020745 | Pafah1b1        | 0.66253446   | 0.000117487 |
| (a) | ENSMUSG00000058013 | Sept11          | 0.660582693  | 2.84E-06    |
| (a) | ENSMUSG00000044783 | Hjurp; A730008H | 0.658041479  | 3.60E-05    |
| (a) | ENSMUSG00000036840 | Siah1a          | 0.657680953  | 0.013660303 |
| (a) | ENSMUSG00000021395 | Spin1           | 0.651307243  | 8.27E-05    |
| (a) | ENSMUSG0000004201  | Cdc25c          | 0.644866707  | 0.014907419 |
| (a) | ENSMUSG00000031660 | Brd7            | 0.636059688  | 5.96E-05    |
| (a) | ENSMUSG00000027469 | Tpx2            | 0.620605976  | 6.44E-07    |
| (a) | ENSMUSG00000040102 | Klh42           | 0.597681867  | 0.002249213 |
| (a) | ENSMUSG00000031016 | Wee1            | 0.597337809  | 0.004310663 |
| (a) | ENSMUSG00000032782 | Cntrob          | 0.59299817   | 0.009223145 |
| (a) | ENSMUSG00000027635 | Dsn1            | 0.584347074  | 0.009490434 |
| (a) | ENSMUSG00000038248 | Cep250          | 0.584230814  | 0.001171653 |
| (a) | ENSMUSG00000021115 | Vrk1            | 0.583137623  | 0.001187377 |
| (a) | ENSMUSG00000032411 | Tfdp2           | 0.579275308  | 0.008736487 |
| (a) | ENSMUSG00000026622 | Nek2            | 0.574020162  | 0.000782224 |
| (a) | ENSMUSG00000029062 | Cdk11b          | 0.562987388  | 0.00157887  |
| (a) | ENSMUSG00000079614 | Seh1            | 0.557761568  | 0.000476266 |
| (a) | ENSMUSG00000031016 | Stard13         | 0.548317087  | 0.005023153 |
| (a) | ENSMUSG00000017421 | Zfp207          | 0.540435018  | 1.67E-05    |
| (a) | ENSMUSG00000022772 | Senp5           | 0.534257651  | 0.005282818 |
| (a) | ENSMUSG00000062248 | Cks2            | 0.525562066  | 0.000716892 |
| (a) | ENSMUSG00000065954 | Tacc1           | 0.523267466  | 0.016846299 |
| (a) | ENSMUSG00000048170 | Mcmcbp          | 0.513937537  | 0.00072363  |
| (a) | ENSMUSG00000091337 | Eid1            | 0.506031964  | 0.001903471 |
| (a) | ENSMUSG0000008859  | Rala            | 0.503600495  | 0.004299335 |
| (a) | ENSMUSG00000066979 | Bub3            | -0.501634069 | 0.011959789 |
| (a) | ENSMUSG00000020107 | Anapc16         | -0.510616156 | 0.003186685 |
| (a) | ENSMUSG00000023572 | Ccnbdp1         | -0.514678622 | 0.003154171 |
| (a) | ENSMUSG0000005699  | Pard6a          | -0.517846802 | 0.039049402 |
| (a) | ENSMUSG00000021866 | Anxa11          | -0.531957071 | 0.020315648 |
| (a) | ENSMUSG00000062234 | Gak             | -0.54617391  | 0.000114479 |
| (a) | ENSMUSG00000031913 | Vps4a           | -0.552456016 | 0.002103081 |
| (a) | ENSMUSG00000022750 | Klh22           | -0.557912574 | 1.42E-05    |
| (a) | ENSMUSG00000031729 | Ist1            | -0.565437439 | 3.29E-05    |
| (a) | ENSMUSG00000039660 | Spout1          | -0.568145468 | 0.018786373 |
| (a) | ENSMUSG00000026965 | Anapc2          | -0.568183983 | 0.007282714 |
| (a) | ENSMUSG00000060860 | Ube2s           | -0.568718511 | 0.025689312 |
| (a) | ENSMUSG0000006728  | Cdk4            | -0.571553111 | 0.013891294 |
| (a) | ENSMUSG00000026027 | Stradb          | -0.576688591 | 0.002119742 |
| (a) | ENSMUSG00000029394 | Cdk2ap1         | -0.580844077 | 0.0041701   |
| (a) | ENSMUSG00000022178 | Ajuba           | -0.593823139 | 0.002078189 |
| (a) | ENSMUSG00000038393 | Txnp1           | -0.594386963 | 9.72E-05    |
| (a) | ENSMUSG00000044502 | Bod1            | -0.600406684 | 0.0029971   |
| (a) | ENSMUSG00000036106 | Prr5            | -0.637974541 | 0.003194568 |
| (a) | ENSMUSG00000033088 | Triobb          | -0.653629912 | 5.96E-05    |
| (a) | ENSMUSG00000068580 | Zfyve19         | -0.65685323  | 0.01038853  |
| (a) | ENSMUSG00000028969 | Cdk5            | -0.664415801 | 0.003147216 |
| (a) | ENSMUSG00000030397 | Mark4           | -0.671741646 | 0.000733473 |
| (a) | ENSMUSG00000025135 | Anapc11         | -0.681609659 | 0.001672937 |
| (a) | ENSMUSG00000055128 | Cgrfr1          | -0.683235152 | 0.000248145 |
| (a) | ENSMUSG00000039130 | Zc3hc1          | -0.684319218 | 0.010681326 |
| (a) | ENSMUSG00000072214 | Sept5           | -0.690645324 | 0.000534009 |
| (a) | ENSMUSG00000046691 | Chtf8           | -0.695042671 | 0.001065005 |
| (a) | ENSMUSG00000049680 | Urgcp           | -0.699522049 | 0.001751225 |
| (a) | ENSMUSG00000011114 | Tbrg1           | -0.714600072 | 0.000182082 |
| (a) | ENSMUSG00000096931 | Strada          | -0.720243013 | 0.000236499 |
| (a) | ENSMUSG00000029466 | Anapc7          | -0.736396189 | 0.000302365 |
| (a) | ENSMUSG00000056596 | Trnp1           | -0.738628877 | 0.00028753  |
| (a) | ENSMUSG00000022089 | Bin3            | -0.738864039 | 4.11E-05    |
| (a) | ENSMUSG00000031787 | Katnb1          | -0.749646929 | 0.003048293 |
| (a) | ENSMUSG00000032562 | Gnai2           | -0.751271355 | 5.76E-06    |
| (a) | ENSMUSG00000030272 | Camk1           | -0.753865991 | 0.000441044 |
| (a) | ENSMUSG00000024944 | Arl2            | -0.758003102 | 0.000964331 |
| (a) | ENSMUSG00000035828 | Pim3            | -0.759845555 | 0.007273915 |
| (a) | ENSMUSG00000018821 | Avp1            | -0.776959671 | 0.003633736 |
| (a) | ENSMUSG00000040385 | Ppp1ca          | -0.779563703 | 0.004777702 |
| (a) | ENSMUSG00000020372 | Rack1           | -0.810834752 | 0.000816675 |
| (a) | ENSMUSG00000020307 | Cdc34           | -0.812779932 | 0.000591326 |
| (a) | ENSMUSG00000032171 | Pin1            | -0.816788836 | 0.006029688 |
| (a) | ENSMUSG00000020232 | Hmg20b          | -0.826922615 | 1.65E-06    |
| (a) | ENSMUSG00000051549 | Sirt2           | -0.827291836 | 6.48E-09    |
| (a) | ENSMUSG00000033751 | Gadd45gip1      | -0.833735237 | 0.006574381 |
| (a) | ENSMUSG00000029166 | Mdpe3           | -0.861255055 | 2.56E-06    |
| (a) | ENSMUSG00000028447 | Dctn3           | -0.880601186 | 0.000672658 |
| (a) | ENSMUSG0000000743  | Chmp1a          | -0.883446747 | 4.36E-05    |
| (a) | ENSMUSG00000011589 | Fsd1            | -0.891030398 | 0.001024942 |
| (a) | ENSMUSG00000024190 | Dusp1           | -0.905149229 | 7.62E-05    |
| (a) | ENSMUSG00000004864 | Mapk13          | -0.930610653 | 0.015101642 |
| (a) | ENSMUSG00000027510 | Rbm38           | -0.932832193 | 8.99E-05    |
| (a) | ENSMUSG00000024790 | Sac3d1          | -0.946702013 | 1.33E-05    |
| (a) | ENSMUSG00000002635 | Pdc2l1          | -0.973210343 | 0.000216216 |

|             |                    |                   |              |             |
|-------------|--------------------|-------------------|--------------|-------------|
| (b) (c)     | ENSMUSG00000021287 | Xrcc3             | 0.846829454  | 0.003200794 |
| (b) (c)     | ENSMUSG00000022292 | Rrm2b             | 0.844734297  | 0.005539819 |
| (b) (c)     | ENSMUSG00000018189 | Uchf5             | 0.843082475  | 3.17E-05    |
| (b) (c)     | ENSMUSG00000021639 | Gtf2h2            | 0.840815984  | 0.000839459 |
| (b) (c)     | ENSMUSG00000030451 | Herc2             | 0.833610619  | 3.27E-06    |
| (b) (c)     | ENSMUSG00000045751 | Mms221            | 0.833534308  | 0.00018003  |
| (b) (c)     | ENSMUSG00000026219 | Trip12            | 0.829056809  | 3.64E-06    |
| (b) (c)     | ENSMUSG00000014074 | Rnf168            | 0.819650037  | 0.00010986  |
| (b) (c)     | ENSMUSG00000033102 | Cdc14b            | 0.806734751  | 5.16E-05    |
| (b) (c)     | ENSMUSG00000022710 | Usp7              | 0.800798872  | 2.84E-06    |
| (b) (c)     | ENSMUSG00000005370 | Msh6              | 0.782072264  | 2.49E-07    |
| (b) (c)     | ENSMUSG00000020413 | Hus1              | 0.773101522  | 0.00050093  |
| (b) (c)     | ENSMUSG00000006599 | Gtf2h1            | 0.771228245  | 2.31E-07    |
| (b) (c)     | ENSMUSG00000020156 | Mum1              | 0.73492519   | 1.01E-05    |
| (b) (c)     | ENSMUSG00000028933 | Xrcc2             | 0.700754596  | 0.02479446  |
| (b) (c)     | ENSMUSG00000028820 | Sfpq              | 0.698015042  | 9.70E-08    |
| (b) (c)     | ENSMUSG00000021690 | Jmy               | 0.683304148  | 0.002507387 |
| (b) (c)     | ENSMUSG00000026048 | Erc5              | 0.68150199   | 2.30E-05    |
| (b) (c)     | ENSMUSG00000037262 | Kin               | 0.679703396  | 0.005274277 |
| (b) (c)     | ENSMUSG00000025261 | Huwe1             | 0.676496827  | 0.000284822 |
| (b) (c)     | ENSMUSG00000026107 | Nabp1             | 0.664984904  | 0.001325482 |
| (b) (c)     | ENSMUSG00000031422 | Morf4l2           | 0.653691048  | 5.59E-05    |
| (b) (c)     | ENSMUSG00000026914 | Psm14             | 0.648542793  | 1.26E-06    |
| (b) (c)     | ENSMUSG00000041064 | Pif1              | 0.642736857  | 0.007184349 |
| (b) (c)     | ENSMUSG00000031928 | Mre11a            | 0.615796547  | 0.000142173 |
| (b) (c)     | ENSMUSG00000028702 | Rad54l            | 0.610960867  | 0.016703794 |
| (b) (c)     | ENSMUSG00000023953 | Polh              | 0.599812741  | 0.003221009 |
| (b) (c)     | ENSMUSG00000020390 | Ube2b             | 0.545006906  | 0.001205153 |
| (b) (c)     | ENSMUSG00000032815 | Fanca             | 0.536317464  | 0.002511832 |
| (b) (c)     | ENSMUSG00000062270 | Morf4l1b; Morf4l1 | 0.534632587  | 7.45E-05    |
| (b) (c)     | ENSMUSG00000025939 | Ube2w             | 0.534620031  | 0.010912349 |
| (b) (c)     | ENSMUSG00000041974 | Spidr             | 0.528372085  | 0.031073854 |
| (b) (c)     | ENSMUSG00000002221 | Paxip1            | 0.524784379  | 0.00219332  |
| (b) (c)     | ENSMUSG00000027342 | Pcna              | 0.510190225  | 0.000149795 |
| (b) (c)     | ENSMUSG00000036781 | Rps27l            | -0.511149122 | 0.000396513 |
| (b) (c)     | ENSMUSG00000055932 | Pto               | -0.542207412 | 0.000836506 |
| (b) (c)     | ENSMUSG00000025218 | Poll              | -0.55673431  | 0.010802132 |
| (b) (c)     | ENSMUSG00000051768 | Xrcc1             | -0.565059274 | 0.011605019 |
| (b) (c)     | ENSMUSG00000030750 | Nsmc1             | -0.568863795 | 0.028505041 |
| (b) (c)     | ENSMUSG00000030271 | Ogg1              | -0.583072498 | 0.005044913 |
| (b) (c)     | ENSMUSG00000019470 | Xab2              | -0.58735495  | 0.013516264 |
| (b) (c)     | ENSMUSG00000024735 | Prpf19            | -0.603078439 | 0.009252702 |
| (b) (c)     | ENSMUSG00000055401 | Fbxo6             | -0.605461249 | 0.034675231 |
| (b) (c)     | ENSMUSG00000002963 | Pnkp              | -0.608418421 | 0.009318974 |
| (b) (c)     | ENSMUSG00000024767 | Otub1             | -0.613242445 | 0.00175532  |
| (b) (c)     | ENSMUSG00000001524 | Gtf2h4            | -0.619546887 | 0.009397437 |
| (b) (c)     | ENSMUSG00000024740 | Ddb1              | -0.638154724 | 0.000264687 |
| (b) (c)     | ENSMUSG00000039615 | Stub1             | -0.651523074 | 0.012419499 |
| (b) (c)     | ENSMUSG00000040174 | Alkbh3            | -0.657991348 | 0.000263542 |
| (b) (c)     | ENSMUSG00000022400 | Rbx1; Rbx1-ps     | -0.681777796 | 0.007300222 |
| (b) (c)     | ENSMUSG00000003549 | Erc1              | -0.70503675  | 0.000830829 |
| (b) (c)     | ENSMUSG00000047617 | Paxx              | -0.739402066 | 0.025341143 |
| (b) (c)     | ENSMUSG00000025374 | Nabp2             | -0.740551441 | 0.00038442  |
| (b) (c)     | ENSMUSG00000024906 | Mus81             | -0.740843757 | 0.000880794 |
| (b) (c)     | ENSMUSG00000051238 | Swsap1            | -0.745232976 | 0.000997283 |
| (b) (c)     | ENSMUSG00000006335 | Tfpt              | -0.769145049 | 0.002356025 |
| (b) (c)     | ENSMUSG00000073684 | Faap20            | -0.784304149 | 0.000270614 |
| (b) (c)     | ENSMUSG00000026162 | -                 | -0.793055183 | 0.00626719  |
| (b) (c)     | ENSMUSG00000030034 | Ino80b            | -0.831592129 | 0.001189751 |
| (b) (c)     | ENSMUSG00000044339 | Alkbh2            | -0.833346258 | 0.011370675 |
| (a) (b) (c) | ENSMUSG00000031095 | Cul4b             | 0.938901225  | 3.79E-07    |
| (a) (b) (c) | ENSMUSG00000027353 | Mcm8              | 0.910799731  | 0.012568127 |
| (a) (b) (c) | ENSMUSG00000031347 | Cetn2             | 0.899437188  | 5.38E-06    |
| (a) (b) (c) | ENSMUSG00000034023 | Fancd2            | 0.885846108  | 0.000378505 |
| (a) (b) (c) | ENSMUSG00000021635 | Rad17             | 0.839230895  | 0.000202922 |
| (a) (b) (c) | ENSMUSG00000025077 | Dclre1a           | 0.826334362  | 0.004672021 |
| (a) (b) (c) | ENSMUSG00000022314 | Rad21             | 0.789659282  | 1.05E-10    |
| (a) (b) (c) | ENSMUSG00000061607 | Mdc1              | 0.714674087  | 0.00017233  |
| (a) (b) (c) | ENSMUSG00000030983 | Bccip             | 0.678298203  | 3.05E-05    |
| (a) (b) (c) | ENSMUSG00000024151 | Msh2              | 0.670732415  | 0.000316942 |
| (a) (b) (c) | ENSMUSG00000001228 | Uhrf1             | 0.63159937   | 2.11E-06    |
| (a) (b) (c) | ENSMUSG00000039187 | Fanci             | 0.58290451   | 0.042490722 |
| (a) (b) (c) | ENSMUSG00000046591 | Ticrr             | 0.570781198  | 0.004776598 |
| (a) (b) (c) | ENSMUSG00000025358 | Cdk2              | 0.513525522  | 0.003009294 |
| (a) (b) (c) | ENSMUSG00000020415 | Pttg1             | -0.74483549  | 0.002444325 |
| (a) (b) (c) | ENSMUSG00000031820 | Babam1            | -0.75298776  | 0.005483965 |
| (a) (b) (c) | ENSMUSG00000025144 | Cenpx             | -0.789552562 | 0.003274342 |
| (a) (b) (c) | ENSMUSG00000030744 | Rps3              | -0.829852846 | 0.000231516 |

**Supplementary Table 4.** Sequences of primers used in the study.

| Primer pair | Name           | Position | Sequence              | Use      |
|-------------|----------------|----------|-----------------------|----------|
| 1           | qGAPDH_m_01_F  | F        | CATCTTCCAGGAGCGAGACC  | RTqPCR   |
|             | qGAPDH_m_01_R  | R        | CCTTCAAGTGGGCCCG      | RTqPCR   |
| 2           | qP21_m_01_F    | F        | GCAGACCAGCCTGACAGATTT | RTqPCR   |
|             | qP21_m_01_R    | R        | CTGACCCACAGCAGAAGAGG  | RTqPCR   |
| 3           | qMyo1Cm_01_F   | F        | AAGCTCGCTGACCAGAAGAC  | RTqPCR   |
|             | qMyo1Cm_01_R   | R        | AGCTGCACATGGTCTCCTTC  | RTqPCR   |
| 4           | p21_prom_m_A_F | F        | TTCTGAAGAGGGGAGAGGGG  | ChIPqPCR |
|             | p21_prom_m_A_R | R        | GTCCAGTTCTCAGACCACGG  | ChIPqPCR |
| 5           | p21_prom_m_B_F | F        | TATAAGGAGGCAGCTCGACG  | ChIPqPCR |
|             | p21_prom_m_B_R | R        | GATCTGCGCCTGACTCCAAT  | ChIPqPCR |
| 6           | p21_prom_m_C_F | F        | AGAGGGAGCCTGAAGACTGT  | ChIPqPCR |
|             | p21_prom_m_C_R | R        | CAGGATTGGACATGGTGCCT  | ChIPqPCR |
