# Supplementary material for: Nuclear myosin 1 activates p21 gene transcription in response to DNA damage through a chromatin-based mechanism
Source: PubMed Central journal article supplement (PMC7066169; doi:10.1038/s42003-020-0836-1), 2020-03-11
Supplement: 42003_2020_836_MOESM2_ESM.pdf [file 42003_2020_836_MOESM2_ESM.pdf]

### **Description of additional supplementary items**

**File Name:** Supplementary data 1

**Description:** Data source for all graphs in the paper
